# Supplementary material for: Hollow ZrO2/PPy nanoplatform for improved drug delivery and real-time CT monitoring in synergistic photothermal-chemo cancer therapy
Source: Royal Society of Chemistry journal article supplement (doi:10.1039/c5tb02205c), 2015-12-22
Supplement: c5tb02205c1.pdf [file c5tb02205c1.pdf]

Electronic Supplementary Information

**Hollow ZrO<sub>2</sub>/PPy Nanoplatform for Improved Drug Delivery and Real-Time CT  
Monitoring in Synergistic Photothermal-Chemo Cancer Therapy**

Longfei Tan, Tianlong Liu, Changhui Fu, Shengping Wang, Shiyan Fu, Jun Ren and  
Xianwei Meng\*

Laboratory of Controllable Preparation and Application of Nanomaterials, Center for  
Micro/nanomaterials and Technology, Key Laboratory of Photochemical Conversion and  
Optoelectronic Materials, Technical Institute of Physics and Chemistry,  
Chinese Academy of Sciences, Beijing, 100190, P.R. China.

\*Corresponding author. Tel: 86-10-82543521

E-mail: mengxw@mail.ipc.ac.cn

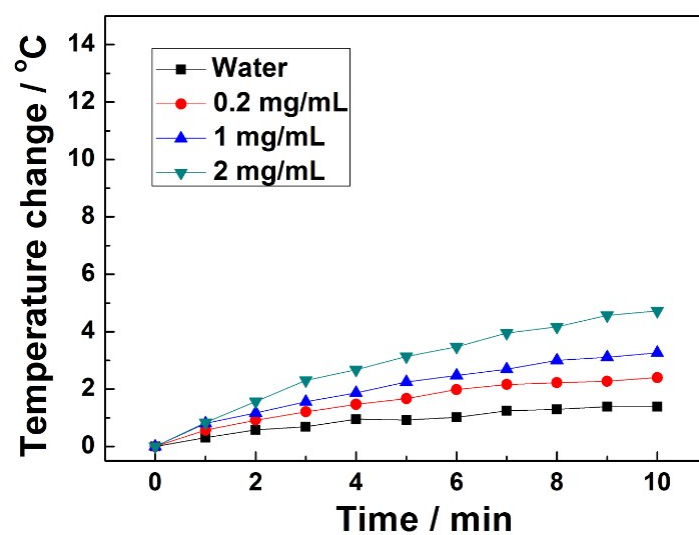

**Figure S1.** The temperature change of ZrO<sub>2</sub> nanoparticles with different concentrations under 808 nm NIR irradiation (1 W/cm<sup>2</sup>).

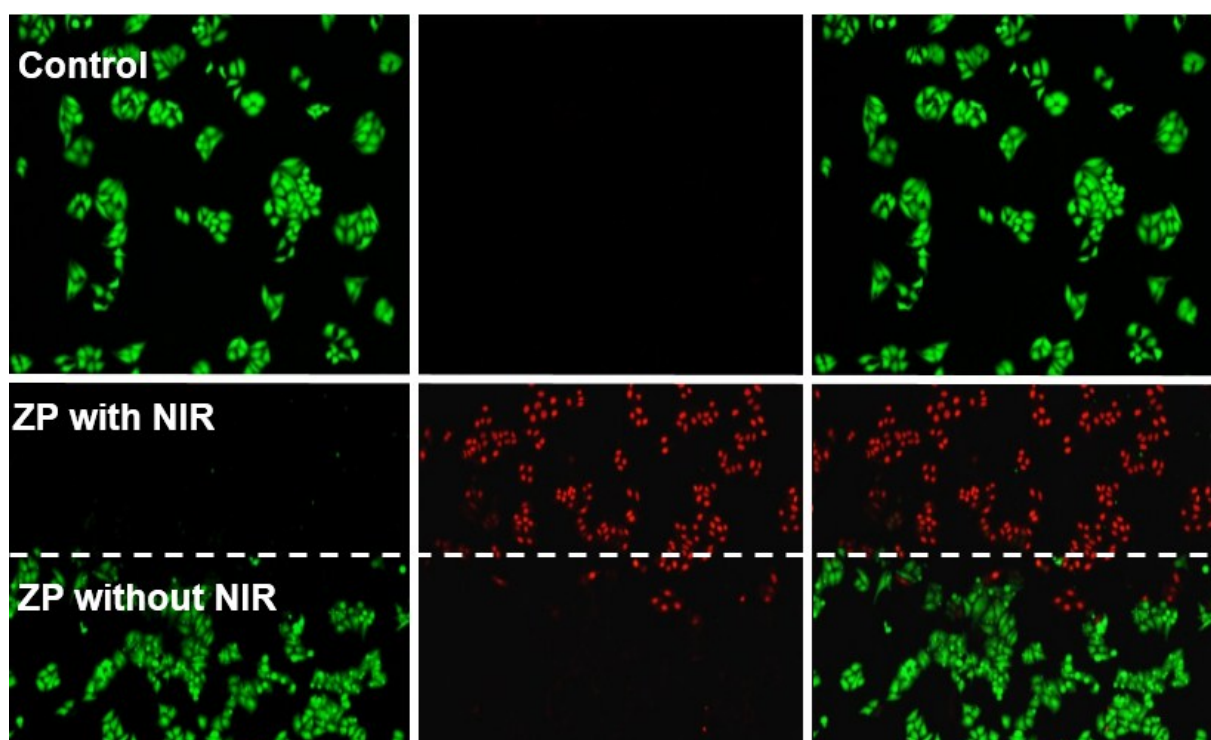

**Figure S2** Fluorescence images of HepG2 cells treated with ZPs under NIR irradiation and without NIR irradiation. Calcein-AM and PI were used to differentiate cells, live cells (green) and dead cells (red).

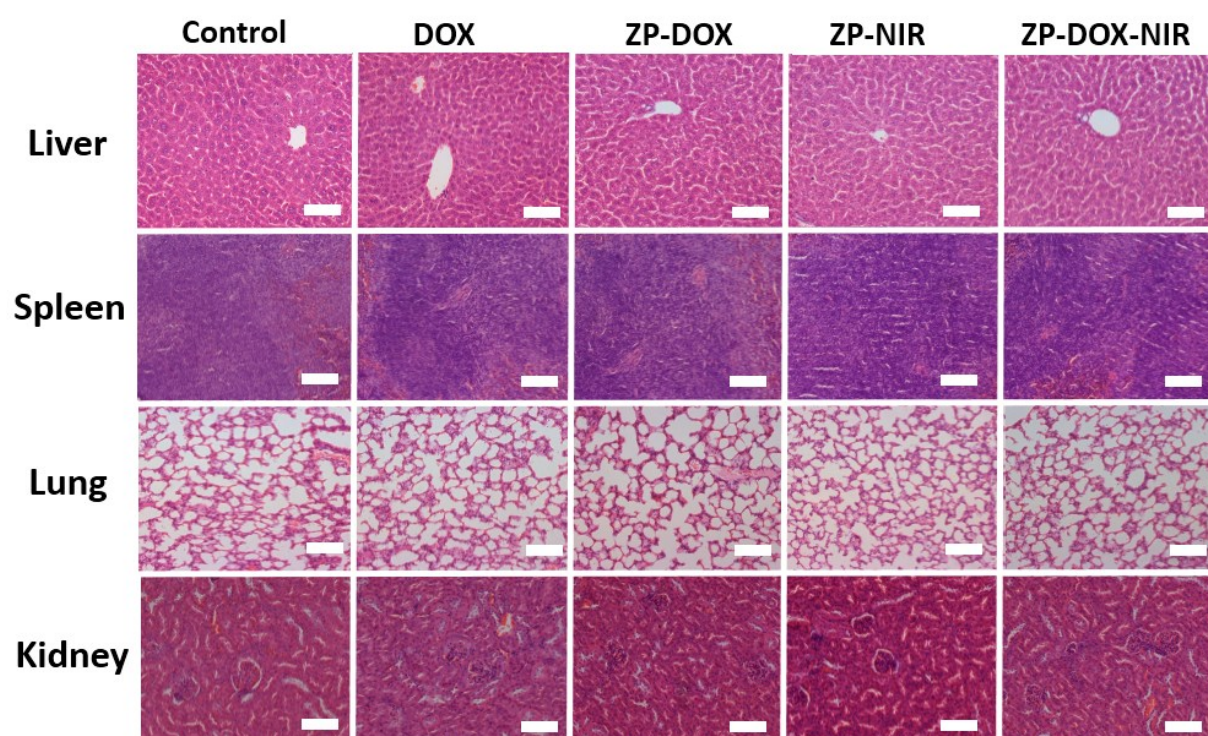

**Figure S3** Histological evaluation of liver, spleen, lung and kidney obtained from Balb/c mice treated with ZPs sacrificed after 14 days. All scale bars are 50  $\mu\text{m}$ .

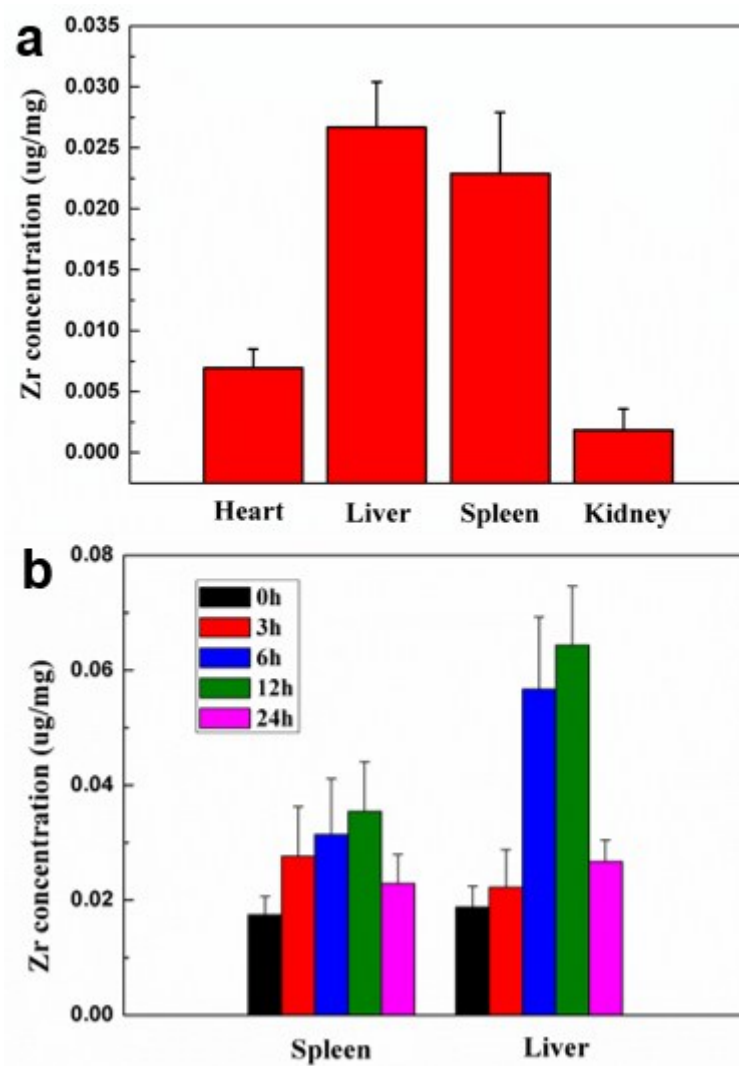

**Figure S4** a) ICP-MS results of ZPs in organs of mini swine at 24 h post injection. b) ICP-MS results of ZPs in liver and spleen of mini swine at different time points measured by biopsy.

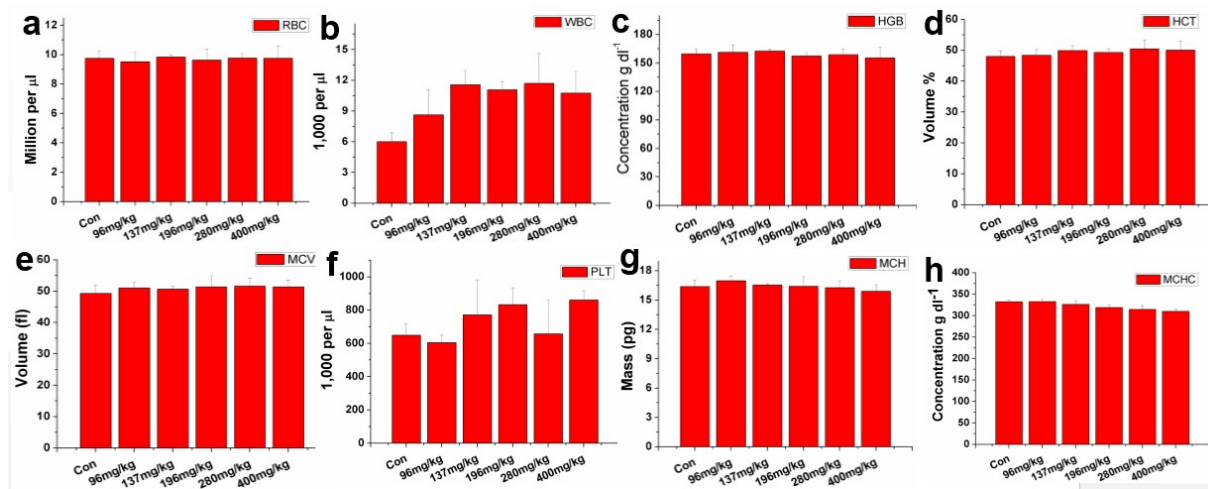

**Figure S5** Blood routine indicators of the mice after intravenously injected with ZPs (400 mg/kg, 280 mg/kg, 196 mg/kg, 137 mg/kg, 96 mg/kg and 0 mg/kg) for two weeks.

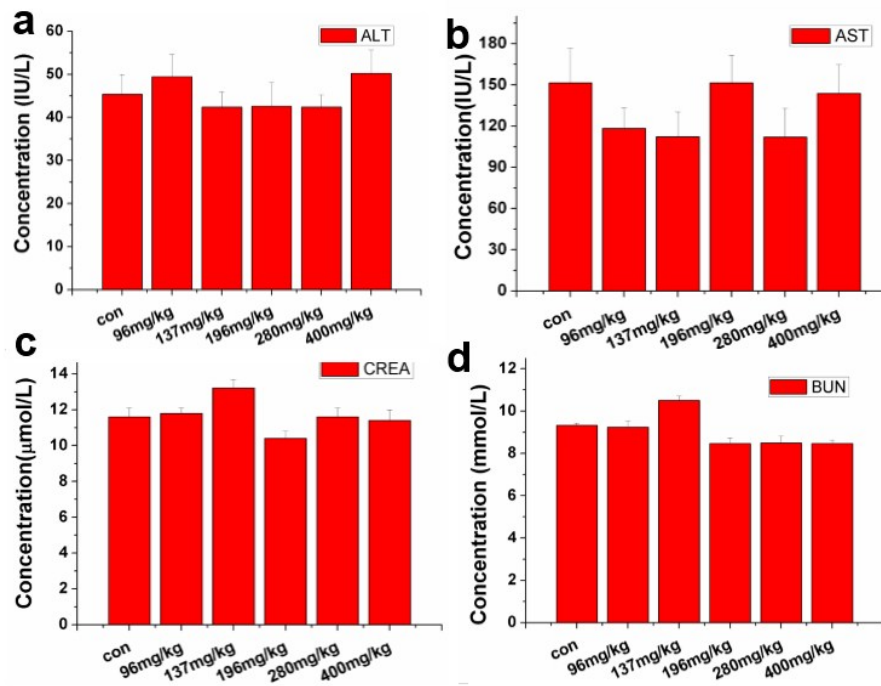

**Figure S6** Blood biochemical indicators of the mice after intravenously injected with ZPs (400 mg/kg, 280 mg/kg, 196 mg/kg, 137 mg/kg, 96 mg/kg and 0 mg/kg) for two weeks.

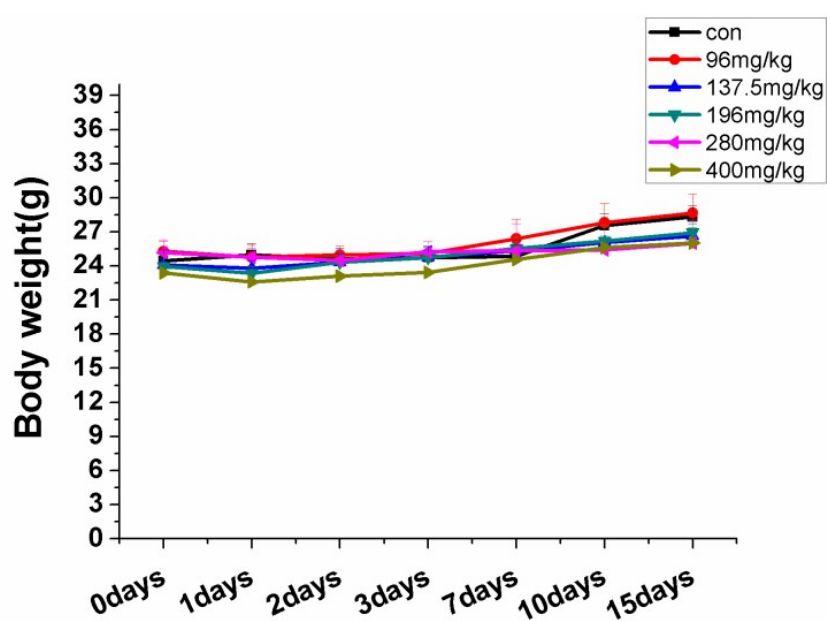

**Figure S7** Time-dependent body weight growth curves of healthy mice intravenous injected with ZPs (400 mg/kg, 280 mg/kg, 196 mg/kg, 137 mg/kg, 96 mg/kg and control group).
